# Supplementary material for: Asymmetric clustering of centrosomes defines the early evolution of tetraploid cells
Source: eLife journal article supplement (doi:10.7554/elife.54565), 2020-04-29
Supplement: supp [file elife-54565-supp-v1.zip]

Archive with 18 entries (18 files):
- elife_poa_e54565_Transparent_Reporting_File.pdf
- elife_poa_e54565_Figure_1_figure_supplement_1.eps
- elife_poa_e54565_Figure_2_figure_supplement_1.eps
- elife_poa_e54565_Figure_3_figure_supplement_1.eps
- elife_poa_e54565_Figure_5_figure_supplement_1.eps
- elife_poa_e54565_Figure_5_figure_supplement_2.pdf
- elife_poa_e54565_Figure_5_figure_supplement_3.eps
- elife_poa_e54565_Figure_5_figure_supplement_4.eps
- elife_poa_e54565_Figure_5_figure_supplement_5.eps
- elife_poa_e54565_Figure_6_figure_supplement_1.eps
- elife_poa_e54565_Figure_1_source_data_1.xlsx
- elife_poa_e54565_Figure_1_source_data_2.xlsx
- elife_poa_e54565_Figure_2_source_data_1.xlsx
- elife_poa_e54565_Figure_2_source_data_2.xlsx
- elife_poa_e54565_Figure_3_source_data_1.xlsx
- elife_poa_e54565_Figure_4_source_data_1.xlsx
- elife_poa_e54565_Figure_5_source_data_1.xlsx
- elife_poa_e54565_Figure_6_source_data_1.xlsx
