# Supplementary material for: Asymmetric clustering of centrosomes defines the early evolution of tetraploid cells
Source: eLife journal article supplement (doi:10.7554/elife.54565), 2020-04-29
Supplement: supp [file elife-54565-supp-v1.zip › elife_poa_e54565_Figure_1_source_data_1.xlsx]

## Sheet: Fig 1B
DLD-1	Bipolar	Tripolar	Tetrapolar	5+ poles
Exp 1	33	39	11	0
Exp 2	45	103	38	5
Exp 3	35	30	5	2
RPE-1 p53-/-
Exp 1	7	16	7	0
Exp 2	35	44	24	0
Exp 3	12	38	19	0

## Sheet: Fig 1D,E
DLD
	Tripolar 2 daughters	Tripolar 3 daughters		Total # divisions
Exp 1	18	21		39
Exp 2	42	61		103
Exp 3	16	14		30
	Tetrapolar 2 daughters	Tetrapolar 3 daughters	Tetrapolar 4 daughters	Total # divisions
Exp 1	5	4	2	11
Exp 2	8	25	5	38
Exp 3	2	1	2	5
RPE-1 p53-/-
	Tripolar 2 daughters	Tripolar 3 daughters		Total # divisions
Exp 1	5	11		16
Exp 2	25	19		44
Exp 3	15	23		38
	Tetrapolar 2 daughters	Tetrapolar 3 daughters	Tetrapolar 4 daughters	Total # divisions
Exp 1	2	4	1	7
Exp 2	7	13	4	24
Exp 3	0	3	16	19
