# Supplementary material for: Asymmetric clustering of centrosomes defines the early evolution of tetraploid cells
Source: eLife journal article supplement (doi:10.7554/elife.54565), 2020-04-29
Supplement: supp [file elife-54565-supp-v1.zip › elife_poa_e54565_Figure_1_source_data_2.xlsx]

## Sheet: Fig1- supp1B
Fixed cell analysis of ana-/ telophase cells
DLD-1	Bipolar	Tripolar	Tetrapolar	5+ poles	# of multipolar (tripolar or tetrapolar) cells with acentrosomal spindle poles
Exp 1	5	13	4	0	0
Exp 2	13	50	8	0	0
Exp 3	8	29	5	0	0
RPE-1 p53-/-
Exp 1	3	19	6	0	0
Exp 2	12	43	15	0	0
Exp 3	24	55	18	0	0

## Sheet: Fig1- supp1D
DLD-1
	# centrioles pre-mitosis	total # centrioles present in daughters, post-mitosis
Exp 1	8	8
	8	8
	8	8
	8	8
	8	8
Exp 2	8	8
	8	8
	8	8
	8	8
	8	8
	8	8
	8	8
	8	8
	8	8
	8	8
	8	8
	8	8
Exp 3	8	8
	8	8
	8	8
	8	8
	8	8
	8	11
	8	8
	8	8
	8	8
	8	8
	8	8
	8	8
	8	8
	8	8
	8	8
	8	8
Exp 4	8	8
	8	8
	8	8
	8	8
	8	8
	8	10
	11	11
	8	8
	8	8
Exp 5	8	8
	8	8
		44
RPE-1 p53-/-		Ana-/telo configuration
	# centrioles pre-mitosis	# centrioles @ DNA cluster 1	# centrioles @ DNA cluster 2	# centrioles @ DNA cluster 3	# centrioles @ DNA cluster 4	ana-/telo polarity	total # centrioles present in daughters, post-mitosis
Exp 1	8	6	2			bipolar	8
	8	4	2	2		tripolar	8
	8	4	2	2		tripolar	8
	8	4	2	2		tripolar	8
	8	4	2	2		tripolar	8
	8	4	2	2		tripolar	8
	6	partially out of focus in ana-/telophase					8
Exp 2	8	4	2	2		tripolar	8
	8	2	2	2	2	tetrapolar	8
	8	2	2	2	2	tetrapolar	8
	8	4	2	2		tripolar	9
	8	2	2	2	2	tetrapolar	8
	8	4	2	2		tripolar	8
	8	4	4			bipolar	8
	8	4	4			bipolar	8
	8	4	2	2		tripolar	8
	8	2	2	2	2	tetrapolar	8
	8	4	2	2		tripolar	8
	6	3	3			bipolar	6
	8	2	2	2	2	tetrapolar	8
	8	4	2	2		tripolar	8
	8	4	2	2		tripolar	9
	8	4	2	2		tripolar	8
Exp 3	8	4	2	2		tripolar	8
	8	4	2	2		tripolar	8
	8	4	2	2		tripolar	8
	8	4	2	2		tripolar	8
	8	2	2	2	2	tetrapolar	8
	8	2	2	2	2	tetrapolar	8
	8	4	2	2		tripolar	8
Exp 4	8	4	3	2		tripolar	9
	8	4	2	2		tripolar	8
	8	2	2	2	2	tetrapolar	8
	8	6	2			bipolar	8
	8	4	2	2		tripolar	8
	8	4	2	2		tripolar	8
	10	4	2	5		tripolar	11
