# Supplementary material for: Asymmetric clustering of centrosomes defines the early evolution of tetraploid cells
Source: eLife journal article supplement (doi:10.7554/elife.54565), 2020-04-29
Supplement: supp [file elife-54565-supp-v1.zip › elife_poa_e54565_Figure_2_source_data_1.xlsx]

## Sheet: Fig 2C,E
Day 0	Day 2	Day 4	Day 6	Day 8	Day 10	Day 12
Experiment 1	Experiment 1	Experiment 1	Experiment 1	Experiment 1	Experiment 1	Experiment 1
44	Experiment 1	42	43	27	21	33
46	44	44	45	39	44	45
46	46	45	46	42	45	45
46	46	46	46	45	45	46
46	46	46	46	46	46	46
46	50	46	46	80	46	46
47	52	46	46	84	46	46
83	54	47	46	86	46	46
88	55	49	46	88	46	46
88	56	65	47	88	46	46
88	57	66	47	90	46	46
89	57	69	80	91	46	46
90	59	71	80	91	46	46
90	60	82	81	92	47	46
90	61	84	86	93	49	46								≤
90	63	84	86	107	50	46
91	64	88	87	Experiment 2	53	48
91	67	89	87	46	59	84
91	67	90	88	46	84	85
91	68	91	89	46	84	86
91	68	92	89	46	86	86
92	71	92	90	46	86	87
92	71	92	90	46	88	87
92	72	92	91	47	89	87
92	73	92	91	62	90	87
92	76	93	91	72	90	88
92	76	93	91	85	90	88
92	77	95	91	87	91	88
92	80	120	92	87	91	89
92	81	153	92	87	92	90
92	82	Experiment 2	92	89	92	90
92	83	42	92	89	92	91
92	84	43	92	90	92	91
92	84	46	92	90	92	91
92	86	46	92	90	92	91
92	87	51	93	91	92	92
92	87	55	94	91	92	92
92	88	66	97	91	93	92
92	89	68	97	91	94	92
92	90	69	Experiment 2	91	110	92
92	90	74	45	92	Experiment 2	92
93	90	76	46	92	46	92
93	91	79	46	92	105	92
93	91	81	46	92	137	93
94	92	82	46	92	90	93
165	92	82	46	92	92	169
Experiment 2	93	83	47	92	92	Experiment 2
46	94	87	52	92	92	43
88	95	88	83	92	45	44
89	95	88	85	92	88	45
89	101	89	87	92	93	46
89	106	89	88	92	46	46
90	107	89	88	92	89	46
90	110	90	88	92	46	46
90	115	90	89	92	46	46
90	135	91	89	95	90	47
91	156	91	89	96	92	71
91	177	91	90	101	92	88
91	189	91	90	166	91	88
91	Experiment 2	91	90	180	113	90
92	45	91	91		91	90
92	50	91	91		167	90
92	51	92	91		88	90
92	53	92	91		92	90
92	61	92	91		46	91
92	61	92	91		92	91
92	62	92	92		91	92
92	64	92	92		92	92
92	65	92	92		92	92
92	70	92	92		92	92
92	79	98	92		91	92
92	86	101	92		92	92
92	87	103	92		91	92
92	88	112	92		93	92
92	88	121	92		89	92
92	88	125	92		93	92
92	90	151	92		91	92
92	91	168	92		92	92
92	91	184	92		57	93
93	91		92			94
94	91		92			95
173	92		92			101
173	92		93
178	92		93
180	92		98
184	92		102
	92		106
	92		133
	93		147
	93		183
	94		186
	95
	96
	100
	105
	116
	125
	126
	153
	170
	184
N-values
Day 0	Day 2	Day 4	Day 6	Day 8	Day 10	Day 12
85	99	78	90	59	78	81

## Sheet: Fig 2D,G
Day 0	Day 2	Day 4	Day 6	Day 8	Day 10	Day 12
Experiment 1	Experiment 1	Experiment 1	Experiment 1	Experiment 1	Experiment 1	Experiment 1
88	92	90	47	77	46	45
92	69	92	46	44	43	45
90	41	91	87	46	46	45
45	37	46	46	45	92	45
46	46	92	92	89	46	45
44	90	92	86	46	45	45
46	121	62	46	84	92	46
46	92	45	42	46	46	46
84	65	89	71	46	45	46
90	91	92	89	45	44	46
90	94	92	72	79	90	46
92	92	68	74	46	46	46
92	91	45	45	80	45	46
46	73	56	96	43	91	46
87	89	46	45	47	90	46
43	92	92	85	90	47	46
88	192	46	45	92	44	46
92	195	88	89	45	46	46
47	64	93	90	92	45	46
44	89	34	90	88	46	65
45	88	45	88	92	89	70
90	45	45	83	91	84	81
90	71	91	46	92	45	82
94	83	90	78	48	92	86
46	86	22	55	89	58	87
44	61	95	44	46	91	89
88	85	45	73	80	46	89
91	84	87	69	87	91	89
92	46	88	46	88	87	90
92	52	61	114	46	46	90
Experiment 2	91	45	91	45	46	91
92	45	58	45	165	90	91
46	45	46	63	46	45	92
91	103	50	82	90	46	92
92	101	69	Experiment 2	84	46	98
46	42	Experiment 2	54	60	94	Experiment 2
90	92	87	46	Experiment 2	46	42
92	90	45	46	46	46	45
45	46	47	73	91	47	45
92	45	67	45	46	46	45
45	46	46	65	46	92	45
92	46	91	90	92	46	46
45	93	46	80	46	58	46
48	92	65	46	44	45	46
91	86	95	46	53	88	46
46	92	74	92	44	Experiment 2	46
44	46	44	99	72	90	46
88	Experiment 2	83	46	46	46	46
63	88	87	86	38	46	46
46	45	62	72	46	123	46
88	60	90	81	76	46	46
46	46	46	86	46	91	46
91	54	46	84	76	88	46
46	46	92	77	46	45	47
46	85	78	87	47	81	59
92	91	71	46	91	46	71
90	85	45	46	44	46	82
94	139	91	45	46	47	86
92	46	69	46	46	44	87
90	90	47	46	92	46	89
88	92	46	66	45	86	90
86	71	46	84	125	51	91
46	92	64	46	46	86	92
45	92	46	92	90	44	92
92	87	49	78	46	46	92
42	66	92	90	46	46	92
45	46		92	46	46	93
46	47		46	92	58	99
92	47		55	92	44	161
92	54		80	60	46
	45		89		46
	72		75		46
	46				45
	92				95
	46				46
	43				46
	46				90
	45				46
	46				84
	45				45
	92				46
	40				46
	92
	92
	60
	77
	46
	46
	48
	89
	92
	45
	90
	88
	90
	125
	95
N-Values
Day 0	Day 2	Day 4	Day 6	Day 8	Day 10	Day 12
69	96	65	71	69	81	68

## Sheet: Fig 2F
DLD		# live cells	# dead cells		% dead
Day 0	Exp 1	174000	2000		1.14943
	Exp 2	146000	4000		2.73973
	Exp 3	77500	2500		3.22581
Day 1	Exp 1	286000	9000		3.14685
	Exp 2	353000	11000		3.11615
	Exp 3	315000	7500		2.38095
Day 2	Exp 1	698000	21000		3.0086
	Exp 2	621000	53000		8.53462
	Exp 3	407500	32500		7.97546
Day 4	Exp 1	31000	4000		12.9032
	Exp 2	107000	3000		2.80374
	Exp 3	61000	4750		7.78689
Day 6	Exp 1	75000	3000		4
	Exp 2	216000	7000		3.24074
	Exp 3	123250	7000		5.67951
Day 8	Exp 1	365000	9000		2.46575
	Exp 2	606000	29000		4.78548
	Exp 3	192500	2500		1.2987
Day 10	Exp 1	1082500	22500		2.07852
	Exp 2	1285000	17500		1.36187
	Exp 3	1930000	37500		1.94301
Day 12	Exp 1	2047500	55000		2.6862
	Exp 2	2725000	52500		1.92661
	Exp 3	1047500	40000		3.81862

## Sheet: Fig 2H
RPE-1 p53-/-					% dead
Day 0	Exp 1	99000	1000		1.0101
	Exp 2	94000	0		0
	Exp 3	42500	0		0
Day 1	Exp 1	150000	3000		2
	Exp 2	181000	6000		3.31492
	Exp 3	282500	2500		0.884956
Day 2	Exp 1	301000	6000		1.99336
	Exp 2	403000	11000		2.72953
	Exp 3	692500	12500		1.80505
Day 4	Exp 1	84000	3000		3.57143
	Exp 2	57000	2000		3.50877
	Exp 3	150750	2250		1.49254
Day 6	Exp 1	549000	19000		3.46084
	Exp 2	574000	8000		1.39373
	Exp 3	1427500	25000		1.75131
Day 8	Exp 1	257000	4000		1.55642
	Exp 2	285000	2000		0.701754
	Exp 3	205000	2500		1.21951
Day 10	Exp 1	1668000	20000		1.19904
	Exp 2	995000	14000		1.40704
	Exp 3	672500	15000		2.23048
Day 12	Exp 1	1448000	11000		0.759669
	Exp 2	1386000	12000		0.865801
	Exp 3	2070000	37500		1.81159
