# Supplementary material for: Asymmetric clustering of centrosomes defines the early evolution of tetraploid cells
Source: eLife journal article supplement (doi:10.7554/elife.54565), 2020-04-29
Supplement: supp [file elife-54565-supp-v1.zip › elife_poa_e54565_Figure_2_source_data_2.xlsx]

## Sheet: Fig 2-supp1
		% DAPI Signal
Bipolar		Daughter 1	Daughter 2	Daughter 3	Daughter 4
Cell 1		46.3637	53.6363
Cell 2		46.9223	53.0777
Cell 3		46.9559	53.0441
Cell 4		47.314	52.686
Cell 5		47.858	52.142
Cell 6		48.3515	51.6485
Cell 7		48.879	51.121
Cell 8		48.94	51.06
Cell 9		49.2248	50.7752
Cell 10		49.3162	50.6838
Cell 11		50.0721	49.9279
Cell 12		50.3122	49.6878
Cell 13		50.3303	49.6697
Cell 14		50.5648	49.4352
Cell 15		50.7449	49.2551
Cell 16		52.1733	47.8267
Cell 17		53.2422	46.7578
Tripolar
Cell 18		34.4647	34.1609	31.3745
Cell 19		35.3513	33.6301	31.0186
Cell 20		36.0575	31.9427	31.9997
Cell 21		36.094	33.6504	30.2556
Cell 22		37.1323	34.8939	27.9738
Cell 23		37.8173	35.3116	26.8711
Cell 24		38.7969	33.7626	27.4406
Cell 25		38.8568	32.7725	28.3707
Cell 26		39.5633	39.2246	21.2121
Cell 27		39.9798	35.5468	24.4734
Cell 28		40.9325	31.6034	27.464
Cell 29		41.4974	31.7485	26.7541
Cell 30		42.5443	38.2158	19.2399
Cell 31		42.7032	29.5504	27.7464
Cell 32		42.7808	32.2223	24.9969
Cell 33		42.9123	34.2037	22.884
Cell 34		43.0787	30.4622	26.4591
Cell 35		44.6652	37.8088	17.526
Cell 36		44.6949	37.1429	18.1622
Cell 37		44.7065	36.3274	18.9661
Cell 38		46.109	34.4306	19.4604
Cell 39		47.9474	36.445	15.6076
Cell 40		48.7852	30.5497	20.6651
Cell 41		49.7467	34.0411	16.2122
Cell 42		67.3812	17.6679	14.951
Tetrapolar
Cell 43		26.7893	24.642	24.8531	23.7156
Cell 44		28.4045	25.1764	24.2885	22.1305
Cell 45		29.2606	24.962	23.305	22.4724
Cell 46		29.4596	24.9105	23.9508	21.6791
Cell 47		30.4203	27.7732	23.9856	17.8209
Cell 48		31.22	23.6767	23.7436	21.3597
Cell 49		34.0938	24.2624	23.6086	18.0353
Cell 50		35.8934	24.951	21.4526	17.7031
Cell 51		36.4632	24.773	21.2456	17.5182
Cell 52		41.4549	25.061	20.1319	13.3522
Cell 53		41.9282	24.3535	17.9041	15.8142
Cell 54		43.1482	24.6513	19.5303	12.6701
