# Supplementary material for: Asymmetric clustering of centrosomes defines the early evolution of tetraploid cells
Source: eLife journal article supplement (doi:10.7554/elife.54565), 2020-04-29
Supplement: supp [file elife-54565-supp-v1.zip › elife_poa_e54565_Figure_3_source_data_1.xlsx]

## Sheet: Fig 3E, Fig 3-supp1
Experiment 1
1st Division	2nd Division Daughter 1	2nd Division Daughter 2	2nd Division Daughter 3	2nd Division Daughter 4
Bipolar	Multipolar	Multipolar
Bipolar	Arrest	Arrest
Bipolar	Multipolar	Multipolar
Bipolar	Arrest	Arrest
Bipolar	Multipolar	Multipolar
Bipolar	Multipolar	Bipolar
Bipolar	Bipolar	Bipolar
Bipolar	Multipolar	Multipolar
Bipolar	Multipolar	Multipolar
Bipolar	Multipolar	Multipolar
Bipolar	Multipolar	Bipolar
Bipolar	Multipolar	Multipolar
Bipolar	Multipolar	Bipolar
Bipolar	Multipolar	Bipolar
Bipolar	Multipolar	Multipolar
Bipolar	Multipolar	Multipolar
Bipolar	Arrest	Multipolar
Bipolar	Multipolar	Multipolar
Bipolar	Multipolar	Multipolar
Bipolar	Multipolar	Bipolar
Bipolar	Multipolar	Bipolar
Bipolar	Bipolar	Multipolar
Bipolar	bipolar	Bipolar
Bipolar	Multipolar	Multipolar
Bipolar	Multipolar	Multipolar
fail cyto	Multipolar
fail cyto	Arrest
Multipolar	Death	Arrest	Arrest
Multipolar	Death	Arrest	Arrest
Multipolar	Bipolar	Arrest	Arrest
Multipolar	Bipolar	Multipolar
Multipolar	Death	Death
Multipolar	Arrest	Arrest
Multipolar	Bipolar	Arrest	Death
Multipolar	Arrest	Arrest
Multipolar	Bipolar	Multipolar	Arrest
Multipolar	Multipolar	Multipolar
Multipolar	Multipolar	Multipolar
Multipolar	Death	Bipolar	Bipolar
Multipolar	Multipolar	Multipolar
Multipolar	Bipolar	Bipolar	Bipolar
Multipolar	Bipolar	Multipolar	Death
Multipolar	Multipolar	Death	Arrest
Experiment 2
First division	2nd Division Daughter 1	2nd Division Daughter 2	2nd Division Daughter 3	2nd Division Daughter 4
Bipolar	Dies	Dies
Bipolar	Dies
Bipolar	Multipolar	Multipolar
Bipolar	Bipolar	Multipolar
Bipolar	Bipolar
Bipolar	Multipolar	Multipolar
Bipolar	Multipolar
Bipolar	Multipolar
Bipolar	Multipolar	Multipolar
Bipolar	Arrest	Arrest
Bipolar	Multipolar	Bipolar
Bipolar	Multipolar	Multipolar
Bipolar	Multipolar	Bipolar
Bipolar	Multipolar	Multipolar
Multipolar	Arrest
Multipolar	Multipolar	Bipolar
Multipolar	Arrest	Multipolar
Multipolar	Bipolar	Bipolar	Bipolar
Multipolar	Arrest	Dies	Bipolar
Multipolar	Dies	Dies
Multipolar	Dies	Arrest
Multipolar	Dies	Arrest
Multipolar	Arrest
Multipolar	Bipolar
Multipolar	Bipolar	Died	Arrest
Multipolar	Arrest
Multipolar	Bipolar	Multipolar
Multipolar	Bipolar	Arrest	Arrest
Multipolar	Bipolar	Multipolar	Dies
Multipolar	Multipolar	Arrest
Multipolar	Arrest
Multipolar	Multipolar	Multipolar
Multipolar	Arrest	Arrest
Multipolar	Bipolar	Multipolar
Multipolar	Bipolar	Bipolar	Multipolar
Multipolar	Dies	Bipolar	Dies
Multipolar	Bipolar	Multipolar	Bipolar
Multipolar	Dies	Multipolar	Arrest
Multipolar	Multipolar	Multipolar
Multipolar	Multipolar	Arrest
Multipolar	Arrest	Arrest	Arrest
Multipolar	Multipolar	Arrest
Experiment 3
First division	2nd Division Daughter 1	2nd Division Daughter 2	2nd Division Daughter 3	2nd Division Daughter 4
Bipolar	Arrest	Arrest
Bipolar	Arrest
Multipolar	Dies	Bipolar	Multipolar
Multipolar	Arrest	Arrest	Arrest
Multipolar	Multipolar	Bipolar	Multipolar
Multipolar	Arrest	Arrest	Arrest
Multipolar	Arrest	Arrest
Multipolar	Bipolar	Arrest	Arrest	Arrest
Multipolar	Arrest	Arrest
Multipolar	Arrest	Arrest
Multipolar	Arrest	Arrest	Bipolar
Multipolar	Dies	Dies	Dies
Multipolar	Arrest	Arrest	Arrest
