# Supplementary material for: Asymmetric clustering of centrosomes defines the early evolution of tetraploid cells
Source: eLife journal article supplement (doi:10.7554/elife.54565), 2020-04-29
Supplement: supp [file elife-54565-supp-v1.zip › elife_poa_e54565_Figure_4_source_data_1.xlsx]

## Sheet: Fig 4C
DLD
Day 0	# Centrioles
Interphase (G0/G1)	<=2	>2	Total # Cells	% supernum
Exp 1	9	96	105	91.4286
Exp 2	12	94	106	88.6792
Mitosis	<=4	>4
Exp 1	13	17	30	56.6667
Exp 2	10	46	56	82.1429
Day 2	# Centrioles
Interphase (G0/G1)	<=2	>2
Exp 1	62	54	116	46.5517
Exp 2	31	72	103	69.9029
Mitosis	<=4	>4
Exp 1	26	24	50	48
Exp 2	18	32	50	64
Day 4	# Centrioles
Interphase (G0/G1)	<=2	>2
Exp 1	67	47	114	41.2281
Exp 2	62	42	104	40.3846
Mitosis	<=4	>4
Exp 1	22	9	31	29.0323
Exp 2	27	17	44	38.6364
Day 6	# Centrioles
Interphase (G0/G1)	<=2	>2
Exp 1	85	37	122	30.3279
Exp 2	69	34	103	33.0097
Mitosis	<=4	>4
Exp 1	35	7	42	16.6667
Exp 2	36	12	48	25
Day 8	# Centrioles
Interphase (G0/G1)	<=2	>2
Exp 1	74	30	104	28.8462
Exp 2	86	26	112	23.2143
Mitosis	<=4	>4
Exp 1	39	9	48	18.75
Exp 2	37	12	49	24.4898
Day 10	# Centrioles
Interphase (G0/G1)	<=2	>2
Exp 1	83	21	104	20.1923
Exp 2	Interphase analysis was not possible/clear
Mitosis	<=4	>4
Exp 1	36	10	46	21.7391
Exp 2	40	12	52	23.0769
Day 12	# Centrioles
Interphase (G0/G1)	<=2	>2
Exp 1	97	20	117	17.094
Exp 2	99	18	117	15.3846
Mitosis	<=4	>4
Exp 1	40	9	49	18.3673
Exp 2	46	10	56	17.8571
Parental 2n	# Centrioles
Interphase (G0/G1)	<=2	>2	Total # Cells	% supernum
Exp 1	82	15	97	15.4639
Exp 2	90	14	104	13.4615
Mitosis	<=4	>4
Exp 1	60	7	67	10.4478
Exp 2	49	7	56	12.5

## Sheet: Fig 4D
RPE-1 p53-/-
Day 0	# Centrioles
Interphase (G0/G1)	<=2	>2	Total # Cells	% supernum
Exp 1	16	86	102	84.3137
Exp 2	11	102	113	90.2655
Mitosis	<=4	>4
Exp 1	30	21	51	41.1765
Exp 2	29	25	54	46.2963
Day 2	# Centrioles
Interphase (G0/G1)	<=2	>2	Total # Cells	% supernum
Exp 1	37	67	104	64.4231
Exp 2	47	58	105	55.2381
Mitosis	<=4	>4
Exp 1	17	22	39	56.4103
Exp 2	18	31	49	63.2653
Day 4	# Centrioles
Interphase (G0/G1)	<=2	>2	Total # Cells	% supernum
Exp 1	61	41	102	40.1961
Exp 2	52	54	106	50.9434
Mitosis	<=4	>4
Exp 1	29	21	50	42
Exp 2	28	21	49	42.8571
Day 6	# Centrioles
Interphase (G0/G1)	<=2	>2	Total # Cells	% supernum
Exp 1	74	32	106	30.1887
Exp 2	67	39	106	36.7925
Mitosis	<=4	>4
Exp 1	35	16	51	31.3725
Exp 2	36	14	50	28
Day 8	# Centrioles
Interphase (G0/G1)	<=2	>2	Total # Cells	% supernum
Exp 1	83	26	109	23.8532
Exp 2	76	27	103	26.2136
Mitosis	<=4	>4
Exp 1	38	12	50	24
Exp 2	43	7	50	14
Day 10	# Centrioles
Interphase (G0/G1)	<=2	>2	Total # Cells	% supernum
Exp 1	82	24	106	22.6415
Exp 2	79	32	111	28.8288
Mitosis	<=4	>4
Exp 1	39	12	51	23.5294
Exp 2	42	7	49	14.2857
Day 12	# Centrioles
Interphase (G0/G1)	<=2	>2	Total # Cells	% supernum
Exp 1	97	10	107	9.34579
Exp 2	86	18	104	17.3077
Mitosis	<=4	>4
Exp 1	47	3	50	6
Exp 2	42	6	48	12.5
Parental 2n	# Centrioles
Interphase (G0/G1)	<=2	>2	Total # Cells	% supernum
Exp 1	96	8	104	7.69231
Exp 2	94	8	102	7.84314
Mitosis	<=4	>4
Exp 1	45	2	47	4.25532
Exp 2	35	2	37	5.40541
