# Supplementary material for: Asymmetric clustering of centrosomes defines the early evolution of tetraploid cells
Source: eLife journal article supplement (doi:10.7554/elife.54565), 2020-04-29
Supplement: supp [file elife-54565-supp-v1.zip › elife_poa_e54565_Figure_5_figure_supplement_2.pdf]

**Figure 5-figure supplement 2: Model parameters for DLD-1 and RPE-1 p53<sup>-/-</sup> cells.**

| Symbols  | Description                                                                                           | DLD-1               | RPE-1 p53 <sup>-/-</sup> | Range for data fitting  | Reason/Source of information                                                                                                           |
|----------|-------------------------------------------------------------------------------------------------------|---------------------|--------------------------|-------------------------|----------------------------------------------------------------------------------------------------------------------------------------|
| $b_{C2}$ | Proliferation rate of C <sub>2</sub> and SC cells                                                     | 1.2 d <sup>-1</sup> | 0.94 d <sup>-1</sup>     | 0.8~1.2 d <sup>-1</sup> | Range estimated from growth curves (not shown)                                                                                         |
| $b_{C4}$ | Proliferation rate of C <sub>4</sub> cells                                                            | 1 d <sup>-1</sup>   | 0.6 d <sup>-1</sup>      | 0.6~1 d <sup>-1</sup>   | Range estimated from growth curves (not shown)                                                                                         |
| $q$      | Probability of bipolar division in C <sub>2</sub> cells                                               | 0.975               | 0.975                    | 0.975~1                 | 1 - (prob cytokinesis failure <sup>40</sup> )                                                                                          |
| $p$      | Probability that a C <sub>4</sub> cell undergoes bipolar division                                     | 0.33                | 0.25                     | Fixed                   | Figure 1B                                                                                                                              |
| $r$      | Probability of symmetric division in a bipolar division of C <sub>4</sub> cell                        | 0.5                 | 0.7                      | Fixed                   | Figure 5C                                                                                                                              |
| $f_s$    | Probability that a C <sub>4</sub> cell deriving from a multipolar division of C <sub>4</sub> survives | 0.4                 | 0.7                      | Fixed                   | Inferred, Figure 3-figure supplement 1                                                                                                 |
| $dc_2$   | Death rate of C <sub>2</sub> and SC cells                                                             | 0                   | 0                        | Fixed                   | Rates of spontaneous cell death are negligible in both cell lines                                                                      |
| $dc_4$   | Death rate of C <sub>4</sub> cells                                                                    | 0.5 d <sup>-1</sup> | 0.12 d <sup>-1</sup>     | Fixed                   | Inferred, Figure 2F, H                                                                                                                 |
| $dc_6$   | Death rate of C <sub>6</sub> cells                                                                    | 1.5 d <sup>-1</sup> | 1.5 d <sup>-1</sup>      | Fixed                   | Comparable to rate of cell division, because C <sub>6</sub> progeny dies due to multipolar division                                    |
| $v$      | Probability of getting SC cell from a cytokinesis failure event                                       | 0.22                | 0.32                     | 0~0.6 †                 | Range suggested by Figure 3C-figure supplement 1; value obtained from data fitting (Figure 5D, E)                                      |
| $r_s$    | Probability that an SC cell divides symmetrically                                                     | 0.93                | 0.90                     | 0.5~1 †                 | Reason for range: the SC subpopulation likely sustains itself via symmetric divisions; value obtained from data fitting (Figure 5D, E) |

† Parameters that only apply to Model II.
