# Supplementary material for: Asymmetric clustering of centrosomes defines the early evolution of tetraploid cells
Source: eLife journal article supplement (doi:10.7554/elife.54565), 2020-04-29
Supplement: supp [file elife-54565-supp-v1.zip › elife_poa_e54565_Figure_5_source_data_1.xlsx]

## Sheet: Fig 5C
DLD-1	# Symm	# Asymm	Total	% Symm	% Asymm
Exp 1	8	9	17	47.0588	52.9412
Exp 2	11	8	19	57.8947	42.1053
Exp 3	9	8	17	52.9412	47.0588
Exp 4	13	5	18	72.2222	27.7778
Exp 5	7	6	13	53.8462	46.1538
			SUM (n)
			84
			Average	56.7926	43.2074
			S.E.M	4.22818	4.22818
RPE-1 p53-/-	# Symm	# Asymm	Total	% Symm	% Asymm
Exp 1	14	5	19	73.6842	26.3158
Exp 2	5	4	9	55.5556	44.4444
Exp 3	10	3	13	76.9231	23.0769
Exp 4	12	7	19	63.1579	36.8421
			SUM (n)
			60
			Average	67.3302	32.6698
			S.E.M	4.90278	4.90278
