# Supplementary material for: Asymmetric clustering of centrosomes defines the early evolution of tetraploid cells
Source: eLife journal article supplement (doi:10.7554/elife.54565), 2020-04-29
Supplement: supp [file elife-54565-supp-v1.zip › elife_poa_e54565_Figure_6_source_data_1.xlsx]

## Sheet: Fig 6B, Fig6- Supp1A
DLD-1	division type	# centrioles inherited by daughter	daughter fate
Exp 1	Asymmetric	6	Died
		2	Died
	Symmetric	4	Multipolar
		4	Multipolar
	Asymmetric	6	Multipolar
		2	Bipolar
	Symmetric	4	Multipolar
		4	Multipolar
Exp 2	Symmetric	4	Arrest
		4	Arrest
	Symmetric	4	Died
		4	Multipolar
	Symmetric	4	Multipolar
		4	Arrest
	Symmetric	4	Multipolar
		4	Multipolar
	Symmetric	4	Arrest
		4	Arrest
Exp 3	Symmetric	4	Arrest
		4	Multipolar
	Symmetric	4	Multipolar
		4	Arrest
	Asymmetric	2	Arrest
		6	Arrest
	Asymmetric	6	Arrest
		Lost second daughter offscreen
Exp 4	Asymmetric	6	Multipolar
		2	Bipolar
	Asymmetric	6	Died
		2	Died
	Asymmetric	6	Multipolar
		2	Bipolar
	Symmetric	4	Multipolar
		4	Multipolar
	Asymmetric	2	Died
		6	Died
Exp 5	Symmetric	4	Bipolar
		4	Multipolar
	Symmetric	4	Multipolar
		4	Multipolar
	Symmetric	4	Multipolar
		4	Died
	Asymmetric	2	Bipolar
		6	Died
	Asymmetric	2	Bipolar
		6	Bipolar
	Symmetric	4	Arrest
		4	Multipolar
	Symmetric	4	Multipolar
		4	Multipolar

## Sheet: Fig 6C, Fig6- Supp1B
RPE-1 p53-/-	division type	# centrioles inherited by daughter	daughter fate
Exp 1	Symmetric	4	Arrest
		4	Arrest
	Symmetric	4	Arrest
		4	Arrest
	Symmetric	4	Multipolar
		4	Multipolar
	Asymmetric	2	Bipolar
		6	Multipolar
	Asymmetric	2	Bipolar
		6	Multipolar
Exp 2	Symmetric	4	Multipolar
		4	Arrest
	Symmetric	4	Arrest
		4	Arrest
	Symmetric	4	Arrest
		4	Arrest
Exp 3	Symmetric	4	Arrest
		4	Arrest
	Asymmetric	2	Bipolar
		6	Multipolar
	Asymmetric	2	Bipolar
		6	Multipolar
Exp 4	Asymmetric	2	Bipolar
		6	Multipolar
	Asymmetric	2	Arrest
		6	Arrest
	Asymmetric	2	Bipolar
		6	Arrest

## Sheet: Fig 6D
		Bipolar ana-/telo	Multipolar ana-/telo	Total ana-/telo w/ extra centrioles
DLD-1 Parental	Exp 1	32	2	34
	Exp 2	17	0	17
	Exp 3	26	2	28
Total		75		79
20 hr RO-3306 + DCB	Exp 1	15	1	16
	Exp 2	34	2	36
	Exp 3	32	1	33
Total		81		85
Day 0	Exp 1	20	62	82
	Exp 2	23	51	74
	Exp 3	18	44	62
Total		61		218
Day 12	Exp 1	29	2	31
	Exp 2	19	2	21
	Exp 3	38	5	43
Total		86		95
